# Supplementary material
Source: PubMed Central journal article supplement (PMC4285537)

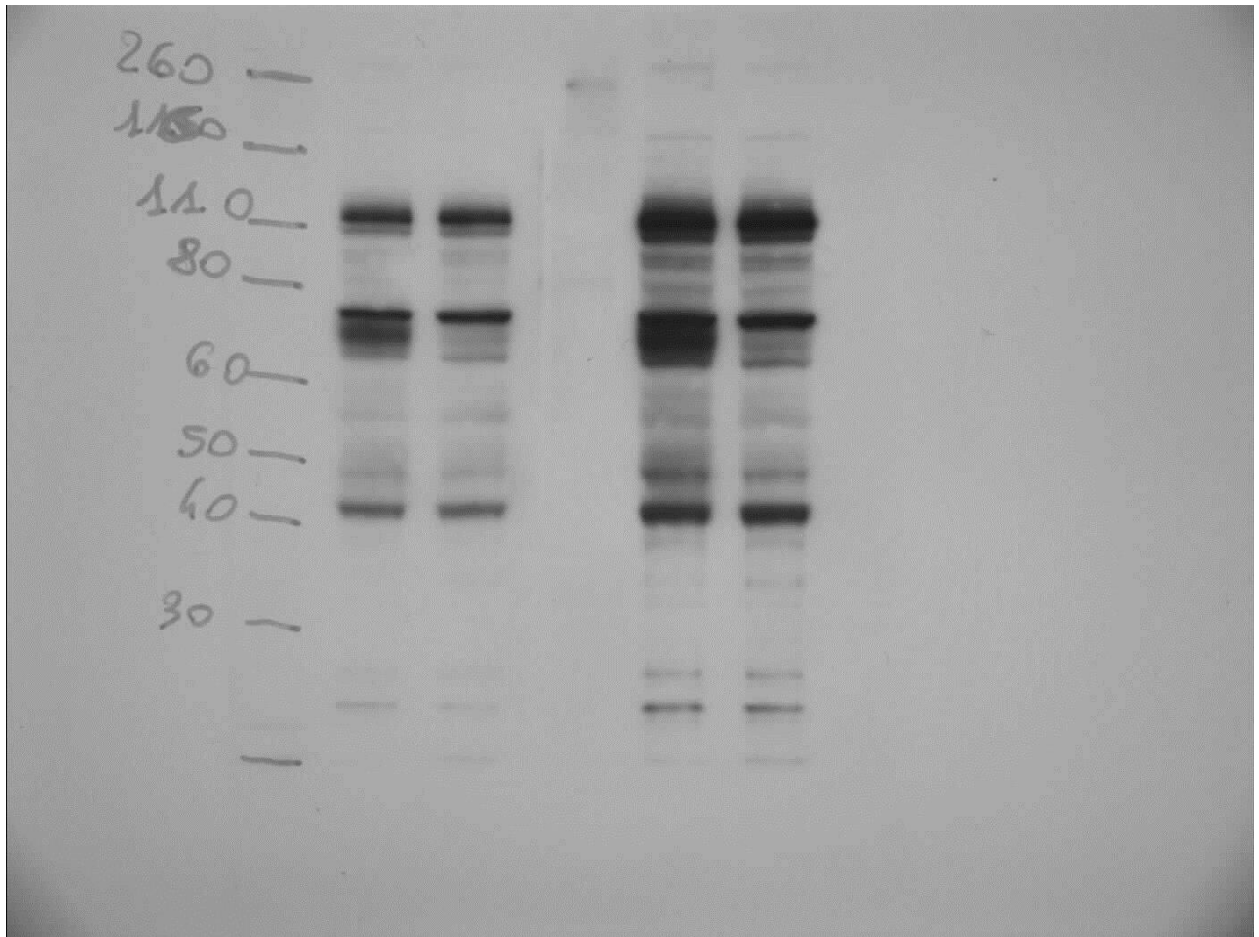

Supplement: supp_fj.14-261867_Supplemental_Figure.pdf [file supp_fj.14-261867_Supplemental_Figure.pdf]
